# Supplementary material for: Ce0.5Zr0.4Sn0.1O2/Al2O3 catalysts with enhanced oxygen storage capacity and high CO oxidation activity
Source: Royal Society of Chemistry journal article supplement (doi:10.1039/c2cy20425h), 2012-01-01

### Supporting Information

**Figure S1.** BET specific surface areas of catalysts. (a') C, (b') CZ, (c') CZS

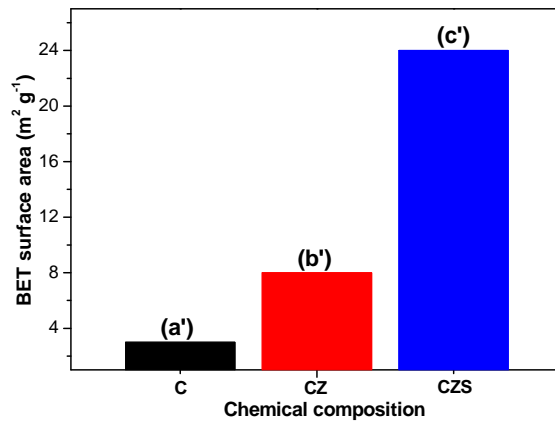

**Figure S2.** Oxygen release/storage properties (TG profiles) of the catalysts at 600 °C. (a') C, (b') CZ, (c') CZS

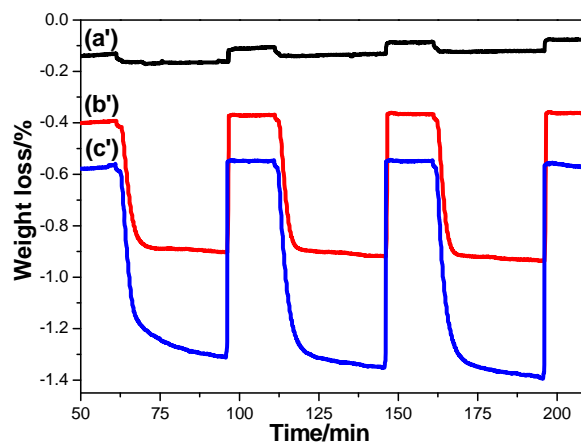

**Figure S3.** OSC of catalysts. (a') C, (b') CZ, (c') CZS

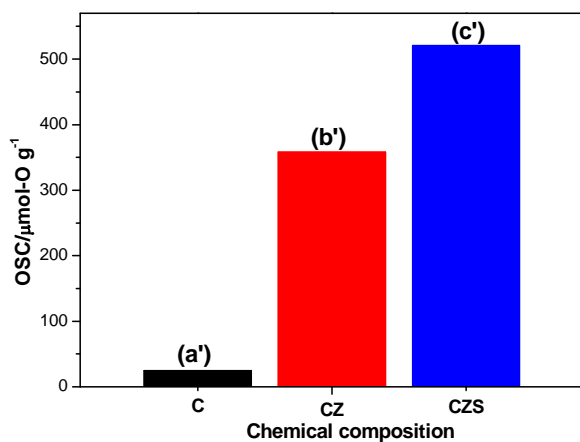

Supplement: c2cy20425h.pdf [file c2cy20425h.pdf]
